# Supplementary material for: Perched Hydrologic Systems of the Monahans and the Kermit Dune Fields, Northern Chihuahuan Desert West Texas, USA
Source: Preprints.org preprint supplement (doi:10.20944/preprints202408.1732.v1), 2024-08-23
Supplement: Supplementary file 1 [file supplementary]

Perched hydrologic systems of the Monahans and the Kermit dune fields, northern Chihuahuan Desert west Texas, USA

Alix Fournier1, Steven L. Forman1, Connor Mayhack1 and Griffin Money2

1 Dept. of Geosciences, Baylor University, Waco, TX, 76798 USA

2 Atlas Energy Solutions, Austin, TX 78730 USA

Supplementary material

Journal: Water MDPI

Table S1: AT1 – Kermit dune field borings – Atlas Sand – June-July 2017, February-March 2019 and September 2021

| DH_Hole | Latitude | Longitude | Elevation (m) | Depth to groundwater (m) | Depth to basal clay (m) | Depth to 1st pedo-complex (m) |
| --- | --- | --- | --- | --- | --- | --- |
| AT1-18-37 | 31.96401492 | -103.0075716 | 914.36952 | 0.03 | 34.1376 |  |
| AT1-18-38 | 31.96299685 | -103.0119351 | 912.76932 | 0.046 | 33.528 |  |
| AT1-18-39 | 31.96178064 | -103.0159432 | 913.647144 | 3.66 | 36.576 |  |
| AT1-18-40 | 31.96279611 | -103.0197826 | 915.26868 | 8.08 | 39.7764 | 20.42 |
| AT1-18-41 | 31.96660895 | -103.0201674 | 913.750776 | 5.79 | 36.2712 | 15.54 |
| AT1-18-42 | 31.97016367 | -103.0188638 | 915.448512 | 4.57 | 44.8056 | 32.31 |
| AT1-18-43 | 31.97376207 | -103.0184179 | 913.1046 | 0.61 | 35.052 | 12.8 |
| AT1-18-44 | 31.97332575 | -103.0215847 | 914.863296 | 7.62 | 35.6616 | 14.32 |
| AT1-18-45 | 31.97600108 | -103.0246198 | 916.618944 | 8.53 | 46.9392 | 38.4 |
| AT1-18-46 | 31.97917212 | -103.0261408 | 914.988264 | 7.32 | 42.9768 | 33.83 |
| AT1-18-47 | 31.9820565 | -103.0236404 | 918.005784 | 9.45 | 43.7388 |  |
| AT1-18-48 | 31.98496046 | -103.0231467 | 914.665176 | 7.32 | 32.3088 |  |
| AT1-18-49 | 31.98385107 | -103.0185133 | 921.07512 | 9.45 | 32.9184 |  |
| AT1-18-50 | 31.98317771 | -103.0146813 | 919.52064 | 4.57 | 31.8516 |  |
| AT1-18-51 | 31.98054533 | -103.015714 | 914.375616 | 0.76 | 28.6512 |  |
| AT1-18-52 | 31.9769474 | -103.0168784 | 913.845264 | 1.22 | 28.6512 |  |
| AT1-18-53 | 31.97733871 | -103.0204185 | 914.043384 | 4.27 | 37.7952 | 19.2 |
| AT1-18-54 | 31.97477699 | -103.0138309 | 915.49728 | 2.13 | 31.242 |  |
| AT1-18-55 | 31.97809547 | -103.0120206 | 915.271728 | 1.22 | 26.2128 |  |
| AT1-18-56 | 31.97486919 | -103.0058727 | 918.508704 | 2.44 | 25.908 |  |
| AT1-18-57 | 31.975728 | -102.9993179 | 921.218376 | 0.31 | 13.2588 |  |
| AT1-18-58 | 31.97224808 | -102.9933428 | 925.522152 | 0.31 | 15.8496 |  |
| AT1-18-59 | 31.96688044 | -102.9940936 | 923.891472 | 2.13 | 17.0688 |  |
| AT1-18-60 | 31.96801204 | -102.9989161 | 918.609288 | 1.22 | 15.8496 |  |
| AT1-18-61 | 31.964265 | -103.001974 | 916.277568 | 1.22 | 23.4696 |  |
| AT1-17-01 | 31.9540886 | -103.0092774 | 907.3896 | 0.31 | 16.764 | 4.27 |
| AT1-17-02 | 31.9579863 | -103.0181014 | 908.4564 | 1.07 | - |  |
| AT1-17-03 | 31.9614187 | -103.0053096 | 911.733 | 1.52 | 30.48 |  |
| AT1-17-04 | 31.9665621 | -103.0144993 | 912.3426 | 0.31 | 30.48 | 27.43 |
| AT1-17-05 | 31.9696460 | -103.0236269 | 912.2664 | 10.67 | 41.4528 | 15.54 |
| AT1-17-06 | 31.9739066 | -103.0095178 | 914.7048 | 1.83 | 25.6032 |  |
| AT1-17-07 | 31.9812684 | -103.0099507 | 917.6004 | 0.91 | 19.812 |  |
| AT1-17-08 | 31.9842109 | -102.9988667 | 928.3446 | 4.57 | 18.288 |  |
| AT1-17-09 | 31.9787729 | -102.9932707 | 929.1066 | 0.31 | 15.24 |  |
| AT1-17-10 | 31.9704515 | -102.9909182 | 927.354 | 5.33 | 20.7264 |  |
| AT1-17-11 | 31.9712279 | -102.9990693 | 919.5816 | 1.52 | 13.716 |  |
| AT1-17-12 | 31.9658485 | -102.9887850 | 929.4876 | 5.33 | 20.7264 | 13.41 |
| AT1-17-13 | 31.9589030 | -102.9913861 | 918.5148 | 4.57 | 18.5928 |  |
| AT1-17-14 | 31.9541007 | -102.9841730 | 922.2486 | 0.31 | 18.288 |  |
| AT1-17-15 | 31.9462565 | -102.9908520 | 913.4856 | 2.29 | 24.384 |  |
| AT1-17-16 | 31.9449876 | -102.9995836 | 908.3802 | 1.83 | 37.4904 |  |
| AT1-17-17 | 31.9479015 | -103.0130077 | 906.3228 | 4.57 | 38.4048 | 33.53 |
| AT1-17-18 | 31.9360347 | -103.0046574 | 905.9418 | 5.49 | 38.7096 |  |
| AT1-17-19 | 31.9404741 | -102.9878977 | 912.114 | 2.29 | 27.432 |  |
| AT1-17-20 | 31.9446305 | -102.9786141 | 921.258 | 2.29 | 16.1544 |  |
| AT1-17-21 | 31.9529463 | -102.9696080 | 930.0972 | 2.29 | 19.2024 |  |
| AT1-17-22 | 31.9455440 | -102.9682756 | 930.021 | 3.35 | 20.7264 |  |
| AT1-17-23 | 31.9251445 | -102.9900541 | 905.3322 | 8.38 | 21.336 | 11.28 |
| AT1-17-24 | 31.9207897 | -102.9825841 | 908.685 | 8.23 | 21.336 |  |
| AT1-17-25 | 31.9126800 | -102.9851000 | 901.7508 | 14.63 |  | 8.23 |
| AT1-17-27 | 31.9324200 | -102.9903000 | 908.6088 | 12.95 | 19.2 |  |
| AT1-17-28 | 31.9871296 | -103.0174213 | 918.8958 | 5.18 | 28.0416 | 23.77 |
| AT1-17-29 | 31.9828921 | -103.0273483 | 913.5618 | 5.49 | 32.9184 | 2.74 |
| AT1-17-30 | 31.9712073 | -103.0242226 | 913.1046 | 7.92 | 32.6136 | 14.02 |
| AT1-17-31 | 31.9716102 | -103.0126788 | 913.503888 | 0.91 | 30.48 |  |
| AT1-17-32 | 31.9697580 | -103.0118307 | 913.397208 | 0.31 | 29.5656 |  |
| AT1-17-33 | 31.9719149 | -103.0089869 | 914.393904 | 0.76 | - |  |
| AT1-17-34 | 31.9702166 | -103.0080160 | 914.189688 | 0.31 | 23.7744 |  |
| AT1-17-35 | 31.9681627 | -103.0075811 | 913.948896 | 0.31 | 23.4696 |  |
| AT1-17-36 | 31.9701257 | -103.0041017 | 915.235152 | 0.31 | - |  |
| AT1-18-62 | 31.977856 | -103.005073 | 918.3624 | 4.42 | 15.24 | 3.05 |
| AT1-18-63 | 31.979228 | -103.007478 | 916.8384 | 1.83 | 17.6784 |  |
| AT1-18-64 | 31.979641 | -103.00168 | 922.3248 | 2.29 | 15.24 |  |
| AT1-18-65 | 31.983069 | -103.004111 | 922.3248 | 1.52 | 14.478 |  |
| AT1-18-66 | 31.979861 | -102.998064 | 928.4208 | 2.29 | 15.14856 |  |
| AT1-18-67 | 31.959162 | -103.003082 | 911.0472 | 3.35 | 23.8506 |  |
| AT1-18-68 | 31.955007 | -103.001348 | 909.5232 | 1.52 | 28.194 |  |
| AT1-18-69 | 31.956812 | -102.995171 | 914.4 | 1.83 | 25.146 |  |
| AT1-18-70 | 31.959857 | -102.997381 | 915.3144 | 1.83 | 24.384 |  |
| AT1-18-71 | 31.952681 | -102.997526 | 911.6568 | 1.83 | 30.48 |  |
| AT1-18-72 | 31.948691 | -102.99924 | 909.2184 | 1.83 | 37.338 |  |
| AT1-18-73 | 31.951823 | -102.993405 | 914.7048 | 2.13 | 27.432 |  |
| AT1-18-74 | 31.954755 | -102.989601 | 916.5336 | 3.2 | 19.05 |  |
| AT1-18-75 | 31.956159 | -102.986575 | 921.4104 | 2.44 | 18.2118 |  |
| AT1-18-76 | 31.959066 | -102.986624 | 924.7632 | 6.09 | 18.288 |  |
| AT1-18-77 | 31.962252 | -102.988364 | 929.64 | 3.35 | 17.526 |  |
| AT1-18-78 | 31.962517 | -102.992493 | 922.3248 | 1.52 | 17.526 |  |
| AT1-18-79 | 31.951413 | -102.97256 | 929.9448 | 9.91 | 26.9748 |  |
| AT1-18-80 | 31.948319 | -102.974574 | 926.592 | 6.4 | 23.1648 |  |
| AT1-18-81 | 31.947756 | -102.981021 | 920.496 | 1.98 | 17.526 |  |
| AT1-18-82 | 31.952306 | -102.97743 | 929.9448 | 5.33 | 21.0312 |  |
| AT1-18-83 | 31.948359 | -102.968444 | 929.9448 | 8.53 | 18.288 |  |
| AT1-18-84 | 31.944301 | -102.973932 | 925.9824 | 8.23 | 23.622 |  |
| AT1-18-85 | 31.941017 | -102.974648 | 924.1536 | 8.69 | 23.7744 |  |
| AT1-18-86 | 31.942588 | -102.971343 | 928.116 | 6.71 | 16.002 |  |
| AT1-18-87 | 31.942685 | -102.967942 | 930.2496 | 10.67 | 26.9748 |  |

Table S2: AT2 – Monahans dune field borings – Atlas Sand – June 2017 and March 2018

| DH_Hole | Latitude | Longitude | Elevation (m) | Depth to groundwater (m) | Depth to basal clay (m) | Depth to 1st pedo-complex (m) |
| --- | --- | --- | --- | --- | --- | --- |
| AT2-17-01 | 31.64228656 | -102.874349840 | 827.3034 | 2.13 | 12.5 |  |
| AT2-17-02 | 31.64600116 | -102.857872782 | 837.2094 | 4.42 | 20.4 |  |
| AT2-17-03 | 31.61929688 | -102.828751209 | 825.1698 |  | 12.95 |  |
| AT2-17-04 | 31.61721968 | -102.843952793 | 820.0644 | 14.48 | 17.5 |  |
| AT2-17-05 | 31.62241801 | -102.866325763 | 816.7878 | 12.19 | - |  |
| AT2-17-06 | 31.66989147 | -102.919142048 | 827.151 | 11.43 | 18.3 | 4.27 |
| AT2-17-07 | 31.68555092 | -102.925819237 | 833.5518 | 14.17 | 27.1 | 2.29 |
| AT2-17-08 | 31.66322719 | -102.939049650 | 822.96 | 11.43 | 22.8 | 2.29 |
| AT2-17-09 | 31.64992021 | -102.951485207 | 813.5112 |  | - | 2.29 |
| AT2-17-10 | 31.67403465 | -102.956950792 | 823.7982 | 16.76 | 21.3 | 1.83 |
| AT2-17-11 | 31.65745709 | -102.968382785 | 813.3588 |  | - | 0 |
| AT2-17-12 | 31.66285562 | -102.982053246 | 814.4256 |  | - | 0.61 |
| AT2-17-13 | 31.69227836 | -102.951396692 | 828.675 | 10.67 | 48.76 | 0 |
| AT2-17-14 | 31.68711875 | -102.977725166 | 826.9224 | 17.52 | 20.12 | 2.29 |
| AT2-17-15 | 31.69311785 | -103.000927274 | 825.4746 | 13.11 | 19.05 | 1.52 |
| AT2-17-16 | 31.70579661 | -102.991109134 | 835.3044 | 19.81 | 31.7 | 0 |
| AT2-17-17 | 31.70811663 | -102.970706664 | 835.6092 | 15.08 | 32 | 1.22 |
| AT2-17-18 | 31.71887283 | -102.976420270 | 838.1238 | 16.31 | 32 | 1.22 |
| AT2-17-19 | 31.71424539 | -102.941541922 | 838.7334 | 17.37 | 34.4 | 2.29 |
| AT2-17-20 | 31.72137751 | -102.958826994 | 841.4766 | 17.52 | 33.5 | 2.59 |
| AT2-17-21 | 31.73646854 | -102.921014393 | 856.2594 | 16.76 | 25.6 |  |
| AT2-17-22 | 31.71970549 | -102.914708187 | 850.2396 | 4.42 | 15.24 |  |
| AT2-17-23 | 31.7255012 | -102.890096913 | 867.0036 | 16.46 | - |  |
| AT2-17-24 | 31.74322284 | -102.890136307 | 876.5286 | 17.98 | 25.15 | 4.57 |
| AT2-17-25 | 31.71480484 | -102.846801879 | 875.538 |  | 24.7 | 5.64 |
| AT2-17-26 | 31.67612006 | -102.842120589 | 852.9066 |  | 10.36 | 3.05 |
| AT2-17-27 | 31.69052914 | -102.859378169 | 857.0214 |  | 11.27 | 6.01 |
| AT2-17-28 | 31.700649 | -102.863512000 | 862.5078 |  | 14.3 | 7.62 |
| AT2-17-29 | 31.71693925 | -102.870375808 | 872.109 |  | 18.3 |  |
| AT2-17-30 | 31.63882215 | -102.972539873 | 808.3296 |  | - | 1.22 |
| AT2-17-31 | 31.63249423 | -102.952896972 | 805.815 |  | - | 1.22 |
| AT2-17-32 | 31.63701753 | -102.929859065 | 809.3202 | 18.28 | - | 2.74 |
| AT2-17-33 | 31.62562237 | -102.926209418 | 804.4434 | 11.58 | 22.1 | 0.61 |
| AT2-17-34 | 31.67274056 | -102.848879922 | 847.5726 | 5.33 | 17.5 |  |
| AT2-17-35 | 31.68195432 | -102.856383987 | 851.6112 |  | 12.5 | 3.05 |
| AT2-17-36 | 31.66875478 | -102.866673456 | 842.9244 | 25.9 | 33.8 |  |
| AT2-17-37 | 31.70140092 | -102.884133359 | 854.7354 |  | - | 8.23 |
| AT2-17-38 | 31.71104426 | -102.883037425 | 860.5266 |  | - | 8.23 |
| AT2-17-39 | 31.70512664 | -102.899261685 | 852.4494 |  | - | 16.46 |
| AT2-17-40 | 31.70319432 | -102.915861873 | 838.8096 |  | - |  |
| AT2-17-41 | 31.69928579 | -102.909305717 | 841.4766 | 14.48 | 20.7 |  |
| AT2-17-42 | 31.6893208 | -102.914765521 | 834.9234 | 13.72 | 27.4 |  |
| AT2-17-43 | 31.67568445 | -102.911309496 | 832.5612 | 12.19 | - |  |
| AT2-17-44 | 31.68807726 | -102.904782760 | 837.2856 | 4.57 | - |  |
| AT2-17-45 | 31.6917336 | -102.892664801 | 843.6102 | 0.31 | - |  |
| AT2-17-46 | 31.69748 | -102.876797938 | 854.2782 | 10.06 | 11.43 |  |
| AT2-17-47 | 31.6939896 | -102.867435020 | 856.107 |  | 12.2 |  |
| AT2-17-48 | 31.68411501 | -102.871814564 | 849.249 | 0.76 | - | 12.19 |
| AT2-17-49 | 31.67910859 | -102.889437176 | 839.4192 | 0.15 | - |  |
| AT2-17-50 | 31.67559598 | -102.877918348 | 842.3148 | 1.52 | 31.4 |  |
| AT2-17-51 | 31.66588555 | -102.883130467 | 838.2762 | 0.31 | 27.13 |  |
| AT2-17-52 | 31.65156704 | -102.878461665 | 831.4182 | 0.31 | 18.3 |  |
| AT2-17-53 | 31.65422033 | -102.858015441 | 839.8002 | 4.57 | - |  |
| AT2-18-54 | 31.65655586 | -102.881803026 | 832.20763 | 12.192 | 20.7 |  |
| AT2-18-55 | 31.65444249 | -102.887486793 | 828.42811 | 12.192 | 18.6 |  |
| AT2-18-56 | 31.65315005 | -102.882931146 | 832.48195 | 11.8872 | 22.6 |  |
| AT2-18-57 | 31.64891404 | -102.884936767 | 828.51040 | 12.4968 | 17.9 |  |
| AT2-18-58 | 31.64877109 | -102.878197467 | 832.7136 | 12.192 | 20.4 |  |
| AT2-18-59 | 31.64532521 | -102.883443699 | 826.4682 | 0 | 12.2 |  |
| AT2-18-60 | 31.64857487 | -102.871383736 | 834.905 | 6.7056 | 21.6 |  |
| AT2-18-61 | 31.6555365 | -102.874361155 | 835.554 | 3.3528 | 26.8 |  |
| AT2-18-62 | 31.65862825 | -102.876815207 | 835.880 | 2.4384 | 26.2 |  |
| AT2-18-63 | 31.65860977 | -102.889102488 | 832.53072 | 3.048 | - |  |
| AT2-18-64 | 31.66636814 | -102.889599786 | 833.332 | 0 | - |  |
| AT2-18-65 | 31.6699504 | -102.893169700 | 832.8294 | 0.9144 | 17.37 |  |
| AT2-18-66 | 31.6710756 | -102.886719300 | 839.44968 | 4.572 | 29.8 |  |
| AT2-18-67 | 31.6693336 | -102.883039600 | 837.8372 | 0.3048 | 29.2 |  |
| AT2-18-68 | 31.672752 | -102.881104000 | 838.6754 | 0.3048 | 28.3 |  |
| AT2-18-69 | 31.6741812 | -102.875657079 | 840.1933 | 0.9144 | 33.2 |  |
| AT2-18-71 | 31.67214184 | -102.868863967 | 840.7847 | 0.9144 | 34.13 |  |
| AT2-18-72 | 31.67652344 | -102.870144722 | 840.95844 | 1.524 | 28.9 |  |
| AT2-18-73 | 31.67763697 | -102.863789397 | 843.0219 | 2.4384 | 27.7 |  |
| AT2-18-74 | 31.673716 | -102.863241053 | 841.7295 | 0.9144 | 30.2 |  |
| AT2-18-75 | 31.6690524 | -102.861972620 | 842.4550 | 2.1336 | 35.05 |  |
| AT2-18-76 | 31.6666527 | -102.862608220 | 840.8852 | 2.4384 | 32.9 |  |
| AT2-18-77 | 31.66329977 | -102.869091369 | 839.75448 | 1.2192 | 35.6 |  |
| AT2-18-78 | 31.66624639 | -102.873325654 | 838.6084 | 0.3048 | 36.6 |  |
| AT2-18-79 | 31.66377038 | -102.881107076 | 836.5022 | 0.9144 | 25.9 |  |
| AT2-18-80 | 31.66228519 | -102.886165553 | 834.11568 | 2.4384 | 23.77 |  |

*The default sediment for these models should be assumed to be eolian sand, unless mentioned otherwise in the “depth to ___ columns”.

Table S3: δD and δ18O isotopic ratios for the Kermit and Monahans dune fields collected from three piezometers in Kermit dune field and thirteen production wells from the Kermit and Monahans Atlas mines, as well as for the Pecos Valley Aquifer from the towns of Wink and Monahans TX, for the Pecos River samples collected between Mentone and Grandfalls TX, and for precipitation in Monahans TX.

| Sample ID | Latitude | Longitude | δD | δ18O | Date |
| --- | --- | --- | --- | --- | --- |
| Ker21-mw1-a | 31.96028 | -103.001811 | -37.48 | -5.24 | 12/16/2021 |
| Ker21-mw1-b | 31.96028 | -103.001811 | -37.52 | -5.39 | 12/16/2021 |
| Ker21-mw2-b | 31.95158 | -103.016764 | -36.86 | -5.14 | 12/16/2021 |
| Ker21-mw3-a | 31.95115 | -103.000292 | -37.63 | -5.28 | 12/16/2021 |
| Ker21-mw3-b | 31.95115 | -103.000292 | -37.62 | -5.32 | 12/16/2021 |
| Ker21-mw1-c | 31.96028 | -103.001811 | -38.24 | -5.27 | 3/6/2022 |
| Ker21-mw2-c | 31.95158 | -103.016764 | -36.19 | -4.99 | 3/6/2022 |
| Ker21-mw2-a | 31.95158 | -103.016764 | -34.47 | -4.07 | 3/6/2022 |
| Kermit-Atlas well 13-14 | 31.97093 | -103.007569 | -35.93 | -4.77 | 3/6/2022 |
| Kermit-Atlas well 10 | 31.96944 | -103.006944 | -36.71 | -5.25 | 3/6/2022 |
| Kermit-Atlas well 1 | 31.96611 | -103.013333 | -37.70 | -4.85 | 3/6/2022 |
| monahans 1 | 31.66185 | -102.880132 | -36.13 | -5.03 | 6/1/2022 |
| monahans 2 | 31.66185 | -102.880132 | -36.52 | -5.10 | 6/1/2022 |
| Monahans-Atlas well 3-5 | 31.66111 | -102.875556 | -35.05 | -4.78 | 3/6/2022 |
| Monahans-Atlas well 3 | 31.65944 | -102.876944 | -36.90 | -4.83 | 3/6/2022 |
| Monahans-Atlas well 1-7 | 31.65861 | -102.879722 | -35.14 | -4.62 | 3/6/2022 |
| Monahans-Atlas well 2-6 | 31.65871 | -102.876103 | -36.40 | -4.62 | 3/6/2022 |
| Monahans-Atlas well 2-3 | 31.65735 | -102.877587 | -33.50 | -4.24 | 3/6/2022 |
| Ker21-mw1 aug 22 | 31.96028 | -103.001811 | -37.11 | -5.42 | 8/17/2022 |
| Ker21-mw2 aug 22 | 31.95158 | -103.016764 | -36.27 | -5.34 | 8/17/2022 |
| Ker21-mw3 aug 22 | 31.95115 | -103.000292 | -36.68 | -5.85 | 8/17/2022 |
| Kermit-Atlas well 9 | 31.97057 | -103.00796 | -36.56 | -5.34 | 8/17/2022 |
| Kermit-Atlas well 10 | 31.97085 | -103.00747 | -36.59 | -5.23 | 8/17/2022 |
| Kermit-Atlas well 11-12 | 31.9679 | -103.01 | -35.64 | -5.08 | 8/17/2022 |
| Monahans-Atlas well 2-3 | 31.66089 | -102.87547 | -35.26 | -4.41 | 8/18/2022 |
| Monahans-Atlas well 3-4 | 31.65806 | -102.87503 | -35.49 | -5.16 | 8/18/2022 |
| Monahans-Atlas well 3-5 | 31.6574 | -102.87762 | -35.78 | -5.03 | 8/18/2022 |
| Monahans-Atlas well 2-6 | 31.65825 | -102.87742 | -35.61 | -5.23 | 8/18/2022 |
| Monahans city 1 | 31.64059 | -103.063248 | -38.20 | -5.25 | 1/6/2022 |
| Monahans city 2 | 31.64059 | -103.063248 | -39.25 | -5.36 | 1/6/2022 |
| Monahans city 3 | 31.64059 | -103.063248 | -40.88 | -5.08 | 1/6/2022 |
| Wink-sprinkler 1 | 31.75747 | -103.155756 | -41.05 | -5.25 | 31/05/2022 |
| Wink-sprinkler 2 | 31.75747 | -103.155756 | -39.22 | -5.11 | 31/05/2022 |
| Wink city 1 | 31.75681 | -103.1588118 | -39.45 | -5.36 | 8/17/2022 |
| Wink city 2 | 31.75681 | -103.1588118 | -41.92 | -5.70 | 8/17/2022 |
| Pecos River 1 | 31.67068 | -103.623348 | -0.37 | 3.92 | 12/16/2021 |
| Pecos River 2 | 31.42702 | -103.390869 | 2.48 | 3.58 | 12/16/2021 |
| Pecos River 3 | 31.30611 | -102.877614 | 18.96 | 7.53 | 31/05/2022 |
| Pecos River 4 | 31.30611 | -102.877614 | 14.69 | 6.93 | 31/05/2022 |
| Pecos River - 18 S Grand Falls | 31.30611 | -102.877614 | -8.57 | 1.61 | 12/16/2021 |
| Monahans - rain 1 | 31.57587 | -102.894826 | -1.93 | 2.30 | 6/1/2022 |
| Monahans - rain 2 | 31.57587 | -102.894826 | -52.79 | -7.08 | 6/3/2022 |
| Kermit - rain | 31.9694 | -103.015181 | -68.19 | -10.16 | 11/26/2022 |
